# Supplementary material for: Precipitation and Microphysical Processes Observed by Three Polarimetric X-Band Radars during HOPE
Source: Copernicus journal article supplement (doi:10.5194/acp-2016-124), 2016-02-12
Supplement: Supplementary file [file acp-2016-124-AC2-supplement.pdf]

1 **Response to Anonymous Referee #2**

2

3 **We thank the reviewer for his/her valuable comments. We responded to the**  
4 **comments and made modifications in the paper accordingly.**

5

6 **RC: reviewer comments**

7 **AR: author response**

8

9 General Comments

10 RC1: This paper presents some data from a two months experiment. The examined  
11 dataset included three polarimetric X-band weather radars supplemented by MRRs,  
12 disdrometers and rain-gauges. The focus of the paper is on the radar observations.  
13 The recorded rain events were of low intensity and this didn't permit a more  
14 advanced evaluation of radars performance. Thus, instead of just showing some daily  
15 statistics and example data from three rain events with typical stratiform rain  
16 characteristics, the authors could present methods of data processing. For example,  
17 they have a network of three radars which overlap in the area of interest and, thus, a  
18 detailed comparison between the radars (and the rest of sensors like the MMR,  
19 disdrometers and raingauges) could be performed. Furthermore, a method for  
20 construction of a mosaic with the quality controlled measurements from the three  
21 radars would be meaningful as a first data analysis. Also, the authors don't even  
22 mention the basic and critical processing algorithms of the radar data like the  
23 attenuation correction scheme and the handling of melting layer (bright band) effect  
24 on the estimated rain field.

25

26 **AR1:**

27 **Thanks for the comments. We started the paper with the description of the HOPE**  
28 **experiment and associated instrumental set up, followed by an analysis of the**

29 three case studies from three polarimetric X-band radar observations. The paper  
30 focuses on multi measurement capability to improve or assess microphysical  
31 process knowledge of precipitation evolution. We thus present here the ability of  
32 three radars for combined observations of precipitation.

33 The HOPE campaign was aimed at an assessment and improvement of the high  
34 resolution climate model ICON (for details about ICON, see  
35 [http://www.mpimet.mpg.de/en/communication/news/focus-on-overview/icon-de-](http://www.mpimet.mpg.de/en/communication/news/focus-on-overview/icon-development/)  
36 [velopment/](http://www.mpimet.mpg.de/en/communication/news/focus-on-overview/icon-development/)) with the available observations, as we stated in the introduction, and  
37 our results presented here approach to the aim of the campaign.

38 About the construction of a mosaic with the quality controlled measurements from  
39 the three radars, a paper from Mauro et al., which is focusing on the radar  
40 composite for HOPE is close to submit. We thus didn't repeat the study in our  
41 paper here.

42 We didn't perform attenuation correction in this paper. Firstly, the precipitation  
43 during HOPE is not intense and the HOPE site is close to the KiXPol and JuXPol,  
44 within 10 km. Thus, for the low rain rate, the attenuation effects due to  
45 precipitation can be negligible. Secondly, for rain rate > 8 mm/h (the duration of  
46 rain rate > 8 mm/h during HOPE is only around 1 hour), the R-Kdp relation which is  
47 unaffected by attenuation effects is employed instead of R-Z relation. Melting layer  
48 effects can also be neglected for rainfall attenuation at least for JuXPol and KiXPol  
49 because of their close proximity to the site. For BoXPol we use the 1° elevation and  
50 over the HOPE area the radar beam height is at ~860 m height, which is below the  
51 melting layer according to radiosonde observations during the precipitation  
52 duration. To make it clearer, we stated this in the paper. (p11, lines 24-26) "...Z and  
53 *Z<sub>DR</sub> attenuation along each radial is neglected since the rain intensities were*  
54 *generally low over the HOPE area...."*

55

56 Specific Comments

57 RC2: Section 2.1, Fig. 1: The setup of the systems shown in Fig. 1 is not optimal at all.

58 Most of the systems (including two radars) are within 5 km distance. If this setup was

59 intended for e.g. the study of small scale spatial distribution of rain this was shown in  
60 the paper.

61

62 **AR2:**

63 **Thanks for the comments. We agreed with the reviewer that the setup of the**  
64 **systems was not optimized for precipitation observations. However, our influence**  
65 **on the setup was limited and the campaign was especially designed for cloud**  
66 **process observations and only to a lesser extent for precipitation observations.**

67 **However, we only concentrated on the observations from the precipitation**  
68 **monitoring instruments over the HOPE area, as we stated on Pg 2 line 13-15.**

69 **All the systems were deployed within 10 km distance and used to verify and**  
70 **improve the high resolution climate and weather forecast model ICON over the**  
71 **HOPE area ( for details about ICON, see**

72 **[http://www.mpimet.mpg.de/en/communication/news/focus-on-overview/icon-de](http://www.mpimet.mpg.de/en/communication/news/focus-on-overview/icon-development/)**  
73 **[velopment/](http://www.mpimet.mpg.de/en/communication/news/focus-on-overview/icon-de)). The results presented in this paper will be useful to evaluate and**  
74 **improve the ICON model and a paper, which evaluates the cloud and precipitation**  
75 **performance of the ICON model with available measurements, is in preparation.**

76

77 **RC3: p. 10, Fig. 4: The daily accumulated precipitation from the 7 disdrometers in Fig.**  
78 **4b has larger range (minimum, maximum) compared to the range from the 3 rain**  
79 **gauges and the 7 disdrometers in Fig. 4a in some days (e.g. on 26 April), while**  
80 **obviously it should be less.**

81

82 **AR3:**

83 **We do believe that the reviewer discussed on Figure 3 since Figure 4 has only one**  
84 **panel. We are sorry for the confusion. To make this clearer, we revised Figure 3 and**  
85 **used different colors for rain accumulation and duration.**

86 **Figure 3a shows the daily rainfall accumulation with the range of bars indicating**  
87 **the range of rain accumulation (mm), while Figure 3b shows the precipitation**  
88 **duration and the range of bars is the precipitation duration in hours.**

89

90 RC4: p. 14, lines 8-14: The conclusions of the authors about Fig. 7 are contradictory.  
91 First they say that precipitation patterns observed by the three radars, but  
92 immediately after the mention a lot of the many reasons why the observed patterns  
93 are different (which is the correct conclusion). They propose that a reconstruction of  
94 the precipitation pattern using a combination of all the radar data should be made,  
95 but as it was noted in the general comments they don't try to implement such a  
96 method.

97

98 **AR4:**

99 **Sorry for the confusion. For clarification, we rephrased the text (Pg 14, line, 12-21).**  
100 **First, we discussed the overall agreement of the rough precipitation patterns**  
101 **observed by the three radars and second, we zoomed into details and noticed also**  
102 **the minor differences between these patterns, e.g., lower precipitation observed**  
103 **by BoXPol located far away from the other two radars. We rephrased the sentences**  
104 **and explained possible reasons responsible for the differences. To eliminate these**  
105 **discrepancies, we thus proposed to make a reconstruction with the three radars in**  
106 **a future study (a paper on the three-radar reconstructed precipitation is about to**  
107 **be submitted).**

108 ***(Pg 14, line, 10-23) "...A 30-min rain accumulation over the inner HOPE area on 29***  
109 ***May 2013 shows that, the three radar estimates result in an overall agreement of***  
110 ***the rough precipitation patterns. However, when we zoomed into details and***  
111 ***noticed also the minor differences between these patterns, e.g., lower precipitation***  
112 ***observed by BoXPol and missing pixels near KiXPol and JuXPol. Bins close to KiXPol***  
113 ***and JuXPol were contaminated by ground clutters while the beam broadening and***  
114 ***height at the larger ranges deteriorates the similarity between the BoXPol and***  
115 ***KiXPol/JuXPol estimates (Fig. 7). A combination of the three radar observations will***  
116 ***definitely be an advantage to reconstruct the precipitation patterns over the HOPE***  
117 ***area in a future study. The different radar observation scenarios, i.e., at an***  
118 ***elevation of 4.5° JuXPol reaches 750 m above KiXPol and the time differences***

119 *between the two radar measurements are up to 5 min, also needs to be considered.*  
120 *Since no adjustments of the  $R-Z_H$  and  $R-K_{DP}$  relations were made, these results are*  
121 *very promising. The three radar estimates together with the direct comparisons*  
122 *with the rain gauges and disdrometers allow to attribute robust error estimates to*  
123 *these precipitation fields, which will be very valuable when compared with model*  
124 *simulations.”*

125

126 RC5: p. 16, Fig. 9: There are not evident melting layer characteristics in the RHIs, even  
127 though it is mentioned in the text to move from 2100 m height down to 830 m  
128 during the event. It would be useful to include in Table 1 (or in a separate table) the  
129 operational parameters of the radar (like beamwidth, antenna rotation rate,  
130 sampling frequency etc.)

131

132 **AR5:**

133 **We agreed with the reviewer that there is no evident melting layer visible in RHIs.**  
134 **However, the radionsondes launched at 11 UTC, 13 UTC, 16 UTC, and 23 UTC were**  
135 **able to capture well the descent of 0°C level: from 2100 m to 830 m height, as**  
136 **stated in Pg. 15 lines 13-16.**

137 **We added the parameters of the radars in Table 1. We also mentioned in the paper**  
138 **that the operational parameters of JuXPoI and BoXPoI can be found in Diederich et**  
139 **al. (2015a) and for KiXPoI under [www.imk-tro.kit.edu/english/5438.php](http://www.imk-tro.kit.edu/english/5438.php).(Pg 4 lines**  
140 **12-15).**

141

142 RC6: Section 4.2: In this section some data from MRR and disdrometers are shown.  
143 As it was noted in the general comments the authors probably have enough data  
144 from the radars and these sensors to make a more detailed and useful comparison of  
145 their measurements. For example, a comparison of radar RHI data over (or near) the  
146 MRR site and MRR data would be an interesting comparison and study of the melting  
147 layer characteristics.

148

149  
150  
151  
152  
153  
154  
155  
156  
157  
158  
159  
160  
161  
162  
163  
164  
165  
166  
167  
168  
169  
170  
171  
172  
173  
174  
175  
176  
177  
178

**AR6:**

We agree with the reviewer that a comparison between MRR and BoXPol would be interesting. However, MRR is in a distance of 200 m away from BoXPol (BoXPol RHI scan every 5 min) and it is noticed that the precipitating system was passing by the MRR within 10 min (Figure 12), i.e., two RHI scans from BoXPol. The coarse temporal resolution of BoXPol makes it difficult to compare directly the MRR and BoXPol observations over the MRR site.

To make this clearer, we added sentences in the revised paper (Pg 21, lines 13-15) *“...However, the coarse temporal resolution of BoXPol RHI scans (every 5 min) makes it difficult to compare directly the MRR observations with BoXPol over the MRR site...”*

RC7: p. 21, lines 22-23: Why consider MRR data at 600m height as a reference (and not e.g. rain gauge data) and conclude that the Parsivels are overestimating rainfall rate? The MRR should be reduced to ground level using the time delay due to the average fall velocity of the droplets to have a proper comparison.

**AR7:**

We agree with the reviewer that a better comparison can be conducted between the surface precipitation measurements. However, the near surface data of MRR can't be used since MRR derives extremely high rain rates which can not be trustable. We stated in Pg 9 lines 3-4, *“...due to the near field scattering effects, MRR observations at the first three gates are not used...”* Therefore, we only use MRR data at 600 m height in Figure 12f.

Also, considering the effects from size sorting and other possible microphysical processes, the rain rate at higher levels is usually higher than on the ground (e.g., rain depleted by evaporation). Also, the two Thies disdrometers close to the Parsivel show a relatively lower maximum rain rate on the ground, too. We thus conclude that the Parsivel is overestimating the rain rate. To make this clearer, we rephrased the text in the revised paper. (Pg 22, lines 1-5) *“...Considering the effects*

179 *from size sorting and other possible microphysical processes, the rain rate at high*  
180 *altitudes is usually higher than on the surface. The two Thies disdrometers close to*  
181 *the Parsivel, which provide measurements at 1 min time intervals, also show a*  
182 *smaller maximum rain rate near the ground and corroborate these findings. We*  
183 *thus conclude that the Parsivel is overestimating the rain rate...”*

184

185 RC8: p. 23, Fig. 13: A comparison of QVPs and data from RHIs would be useful to  
186 understand the difference of QVP from actual vertical profiles and the limitations of  
187 this method.

188

189 **AR8: We agree with the reviewer that a comparison between QVPs and RHIs is**  
190 **useful. However, going into details of each method used in a publication is beyond**  
191 **the scope of a new publication applying different methods. A detailed description**  
192 **of QVPs can be found in Ryzhkov et al.(2016) and Troemel et al. (2014a). Ryzhkov et**  
193 **al. (2016) also included a RHI-QVP comparison. Ryzhkov et al. (2016) discussed in**  
194 **detail the benefits of QVPs and their superiority compared to RHIs with respect to**  
195 **the detection of microphysical processes. We thus did not discuss in detail the**  
196 **limitations of the QVP method in this paper. Additionally, the RHI measurements**  
197 **from JuXPol are available in 5 min and only restricted to a narrow azimuthal**  
198 **direction. Consequently, we decided to show QVPs only in Section 4.3.**

199

1 **Precipitation and Microphysical Processes Observed by**  
2 **Three Polarimetric X-Band Radars and Ground-Based**  
3 **Instrumentation during HOPE**

4 **Xinxin Xie<sup>1</sup>, Raquel Evaristo<sup>1</sup>, Clemens Simmer<sup>1</sup>, Jan Handwerker<sup>2</sup> and Silke**  
5 **Trömel<sup>1</sup>**

6 <sup>1</sup>Meteorological Institute, University of Bonn, Bonn, Germany

7 <sup>2</sup>Institute of Meteorology and Climate Research , Karlsruhe Institute of Technology,  
8 Karlsruhe, Germany

9 *Correspondence to:* Xinxin Xie (xxie@uni-bonn.de)

10

11 **Abstract.** This study presents a first analysis of precipitation and related  
12 microphysical processes observed by three polarimetric X-band Doppler radars  
13 (BoXPol, JuXPol and KiXPol) in conjunction with a ground-based network of  
14 disdrometers, rain gauges and vertically pointing micro rain radars (MRR) during the  
15 High Definition Clouds and Precipitation for advancing Climate Prediction (HD(CP)<sup>2</sup>)  
16 Observational Prototype Experiment (HOPE) during April and May 2013 in Germany.  
17 While JuXPol and KiXPol were continuously observing the central HOPE area near  
18 Forschungszentrum Juelich at a close distance, BoXPol observed the area from a  
19 distance of about 48.5 km. MRRs were deployed in the central HOPE area and one  
20 MRR close to BoXPol in Bonn, Germany. Seven disdrometers and three rain gauges  
21 providing point precipitation observations were deployed at five locations within a  
22 5×5 km<sup>2</sup> region, while **three other** disdrometers were collocated with the MRR in  
23 Bonn. The daily rainfall accumulation at each rain gauge/disdrometer location  
24 estimated from the three X-band polarimetric radar observations showed a very good  
25 agreement. Accompanying microphysical processes during the evolution of  
26 precipitation systems were well captured by the polarimetric X-band radars and



1 corroborated by independent observations from the other ground-based instruments.

## 2 **1. Introduction**

3 In the frame of the project “High Definition Clouds and Precipitation for advancing  
4 Climate Prediction” (HD(CP)<sup>2</sup>), which aims at **evaluating and** improving the accuracy  
5 of climate models in relation to cloud and precipitation processes, the HD(CP)<sup>2</sup>  
6 Observational Prototype Experiment (HOPE) was conducted during April and May  
7 2013 within the study area of the Transregional Collaborative Research Center 32  
8 (Simmer et al., 2015) in the vicinity of the Juelich ObservatorY for Cloud Evolution  
9 (JOYCE) in Germany (Löhnert et al., 2015). The HOPE was conducted in order to  
10 provide observations for high-resolution climate models and to improve our  
11 understandings of cloud and precipitation processes.

12 An array of ground-based instruments deployed during HOPE provided  
13 comprehensive cloud and precipitation process observations. In this study we  
14 concentrate on the precipitation monitoring instruments. Three polarimetric X-band  
15 Doppler radars installed in Bonn (BoXPol) and in the vicinity of the JOYCE site  
16 (JuXPol and KiXPol), respectively, were operated together to continuously monitor  
17 3D precipitation patterns in order to obtain a holistic view of precipitating systems  
18 from micro- and macro-physical perspectives. BoXPol and JuXPol were installed at a  
19 distance of 48.5 km from each other and were operated by the Meteorological  
20 Institute of the University of Bonn and the TERENO program of the Helmholtz  
21 Association (<http://teodoor.icg.kfa-juelich.de>, Zacharias et al., 2011), respectively (see  
22 Diederich et al., 2015a for details on both radars), while KiXPol, which was ~9.6 km  
23 (~50.6 km) away from JuXPol (BoXPol), was deployed by the Karlsruhe Institute of  
24 Technology (KIT). A network composed of rain gauges and disdrometers measured  
25 local precipitation, and collocated Micro Rain Radars (MRR) simultaneously  
26 measured vertical profiles of precipitation and raindrop size distributions (DSD).

27 Dual-polarization radars provide multiparameter measurements, which improve  
28 quantitative precipitation estimation (QPE) compared to single polarization radars

1 (Zrníc and Ryzhkov, 1999; Zhang et al., 2001; Brandes et al., 2002; Ryzhkov et al.,  
2 2014). A thorough comparison of retrieval algorithms for rainfall estimation using  
3 polarimetric observables for the HOPE area can be found e.g. in Ryzhkov et al. (2014)  
4 and Diederich et al. (2015b). Many studies **have** already shown the potential of  
5 polarimetric radars to identify fingerprints of macro- and micro- physical processes  
6 related to the evolution of precipitation systems (Kumjian and Ryzhkov, 2010, 2012;  
7 Kumjian et al., 2012; Andric et al., 2013; Kumjian and Prat, 2014), based on the  
8 sensitivities of polarimetric observables to particle size, shape, concentration and  
9 composition (Bechini et al., 2013; Ryzhkov and Zrníc, 1998; Giangrande et al., 2008).  
10 E.g., very few large rain drops near the ground or at the leading edge of a rain cell  
11 result in a larger mean particle size and induce strong differential reflectivity ( $Z_{DR}$ )  
12 accompanied by small reflectivity ( $Z$ ), which indicates the occurrence of size sorting  
13 (Kumjian and Ryzhkov, 2012). Increasing mean particle sizes due to evaporation and  
14 coalescence may enhance  $Z_{DR}$ , while  $Z$  is reduced during evaporation by the depletion  
15 of small rain drops (Kumjian and Ryzhkov, 2010; Li and Srivastava, 2001).  $Z$ ,  $Z_{DR}$   
16 and specific differential phase ( $K_{DP}$ ) all decrease when large raindrops break up  
17 (Kumjian and Prat, 2014). Such information thus can be used to validate cloud and  
18 precipitation parameterization schemes.

19 The paper is structured as follows. Section 2 introduces the instrumentation deployed  
20 during HOPE, while Section 3 presents the surface rainfall estimated from the radars,  
21 in conjunction with disdrometers and rain gauges. Section 4 presents and discusses  
22 the development of different precipitation systems and related microphysical  
23 processes. Size sorting due to vertical wind shear and coalescence will be illustrated  
24 via the combination of two X-band polarimetric radars. Another case of size sorting  
25 captured by BoXPol and a nearby MRR and disdrometers will also be examined in  
26 detail. Finally, observed riming/aggregation signatures will be discussed. Conclusions  
27 will be given in Section 5.

28

## 29 **2. Instrumentation**

## 1 **2.1 Three X-band polarimetric radars**

2 The three polarimetric X-band Doppler radars BoXPol, JuXPol, and KiXPol were  
3 operating at a frequency of 9.375 GHz. Topography and the locations of the radars,  
4 disdrometers, rain gauges and MRRs are shown in Fig. 1. While JuXPol and KiXPol  
5 were both performing observations in the vicinity of Juelich, Germany, BoXPol  
6 observed the HOPE area from a distance of about 48.5 km on the roof of a building  
7 next to the Meteorological Institute of the University of Bonn in Bonn, Germany,  
8 collocated with one OTT Parsivel and two Thies optical laser disdrometers. The three  
9 polarimetric radars provide the standard polarimetric variables observed in a  
10 simultaneous transmit and receive (STAR) mode, namely  $Z$ ,  $Z_{DR}$ ,  $K_{DP}$ , and  $\rho_{HV}$   
11 (copolar correlation coefficient) in addition to the radial Doppler winds and its  
12 variance. Detailed technical specifications of JuXPol and BoXPol can be found in  
13 Diederich et al. (2015a) and for KiXPol under [www.imk-tro.kit.edu/english/5438.php](http://www.imk-tro.kit.edu/english/5438.php).  
14 The calibration bias of the three radars were corrected following Diederich et al.  
15 (2015a).

16 Figure 2 shows the operation duration of the three polarimetric radars during HOPE.  
17 BoXPol had technical problems on 15 May 2013 and was back to work at around  
18 0800UTC on 16 May 2013. JuXPol performed observation from 5 to 8 April 2013.  
19 Afterwards, no measurements were available until 22 April 2013 due to technical  
20 problems. From 26 to 29 April 2013, JuXPol was only taking range height indicators  
21 (RHI) at  $233.7^\circ$  azimuth oriented towards JOYCE every minute. KiXPol started its  
22 observations on 3 Apr 2013 but had two breakdowns during April. In May, when  
23 KiXPol was performing only RHI scans on request, no PPIs were available.

24

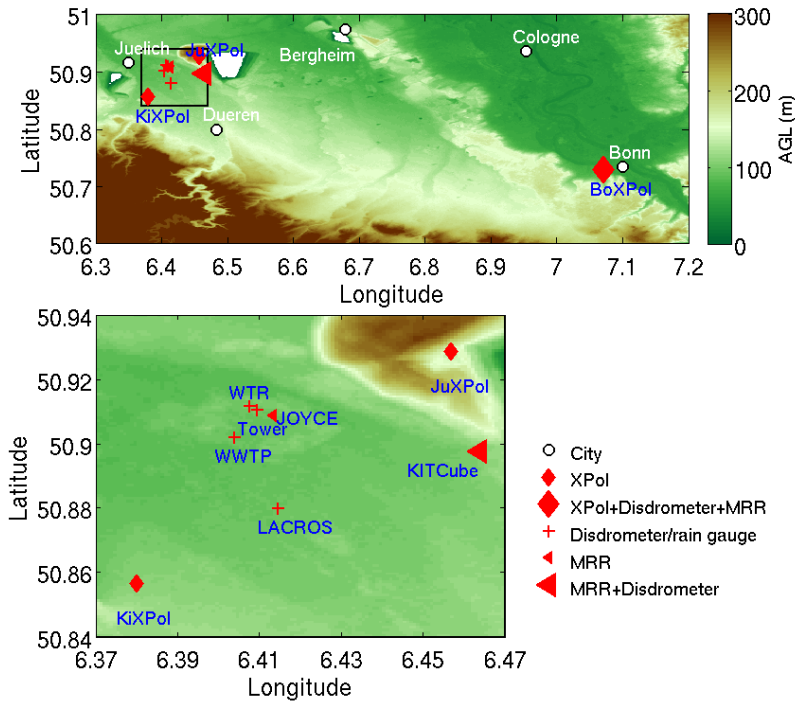

1

2 Figure 1. Location of the three polarimetric X-band radars (XPoL) and associated  
 3 micro rain radars (MRR), rain gauges and disdrometers during HOPE. **The bottom**  
 4 **panel is the zoomed-in region of the black box area on the top.** The red diamond  
 5 markers indicate the locations of the X-band polarimetric radars, the red crosses  
 6 indicate the locations of disdrometers and/or rain gauges at the sites of LACROS (the  
 7 Leipzig Aerosol and Cloud Remote Observations System), KITCube (Kalthoff et al.,  
 8 2013), WWTP (wastewater treatment plant), Tower, WTR (wind-temperature-radar),  
 9 and the red triangles are the MRR locations at JOYCE and KITCube. White areas  
 10 (elevations below sea level) are open-pit mines.

11

12 The three polarimetric X-band radars were performing volume scans consisting of  
 13 stacked plan position indicators (PPI) with different scan strategies (Table 1). In  
 14 addition to the volume scans, BoXPoL and JuXPoL also performed RHIs and vertical  
 15 scans. A full volume scan of BoXPoL and JuXPoL takes about 5 min; in between RHI  
 16 scans and one vertical scan (bird bath scan) were performed. The two RHIs of  
 17 BoXPoL were oriented towards JOYCE (290°) and LACROS (293.4°) after 9 April  
 18 2013, while JuXPoL made RHIs only towards JOYCE. JuXPoL made RHIs every

1 minute between 26 and 29 April 2013 followed by volume scans with PPIs at 10  
 2 elevations and one RHI and vertical scan in 5 minute intervals. KiXPol performed  
 3 only volume scans at 14 elevations every 5 minutes from April 2013 on (see Table 1).  
 4 In May 2013, volume scans were interrupted on demand and instead RHI scans  
 5 directed towards the prevailing wind direction were performed with a temporal  
 6 resolution of 1 minute (Fig. 2).

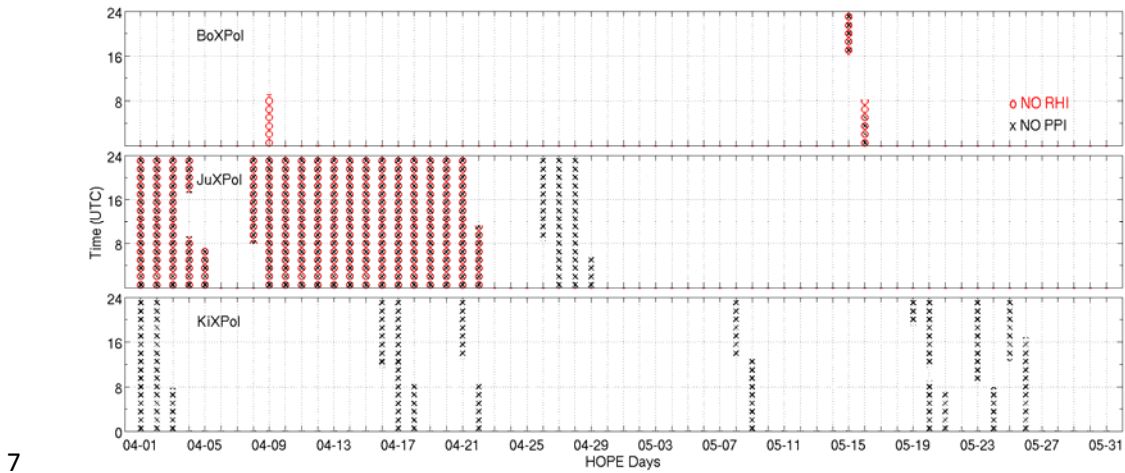

7  
 8 Figure 2. Operation time of the polarimetric X-band radars BoXPol, JuxPol, and  
 9 KiXPol during HOPE from 1 April to 31 May 2013, with the red circles indicating  
 10 “no range height indicator (RHI) available” and the black crosses indicating “no plan  
 11 position indicator (PPI) available”. KiXPol performed only RHIs on demand in May  
 12 where “no PPI” was marked. The general scan strategies of the three polarimetric  
 13 X-band radars are described in Table 1.

14  
 15  
 16  
 17  
 18  
 19

1 Table 1 The three polarimetric radars during HOPE

|                                        | BoXPol                                                         | JuXPol                                               | KiXPol                                                            |
|----------------------------------------|----------------------------------------------------------------|------------------------------------------------------|-------------------------------------------------------------------|
| location in latitude/longitude         | 50.73°/7.07 °                                                  | 50.93 °/6.46 °                                       | 50.86 °/6.38 °                                                    |
| elevation in m a.s.l.                  | 100.0                                                          | 310.0                                                | 106.6                                                             |
| PPIs at elevation in °                 | 1/1.5/2.4/4.5/7/8.2/<br>11/14/18/28                            | 1/2/3.1/4.5/6/8.2/<br>11/14/18/28                    | 0.6/1.4/2.4/3.5/4.8<br>/6.3/8/9.9/12.2/14.8/<br>17.9/21.3/25.4/30 |
| RHIs at azimuth in °                   | 309.5/298.6<br>(1-8 April);<br>290.0/293.4<br>(9 April-31 May) | 118.6<br>(1-25 April);<br>233.7<br>(26 April-31 May) | on request in May                                                 |
| bird-bath scan                         | yes                                                            | yes                                                  | No                                                                |
| radial resolution in m                 | 100 - 150                                                      | 100 - 150                                            | 250                                                               |
| scan period                            | every 5 min                                                    | every 5 min                                          | every 5 min                                                       |
| 3-dB beam width                        | 1.05°                                                          | 1.1°                                                 | 1.35°                                                             |
| Frequency in GHz                       | 9.3                                                            | 9.3                                                  | 9.37                                                              |
| Pulse repetition frequency (PRF) in Hz | 250 - 1600                                                     | 25 - 1600                                            | 1000                                                              |
| Antenna rotation rate(°/s)             | 12 - 28                                                        | 12 - 28                                              | 12 - 28                                                           |

2 **2.2 Rain gauges, disdrometers, MRRs and radiosondes**

3 In the vicinity of JOYCE, disdrometers and rain gauges were installed within an area  
4 of approximately 25 km<sup>2</sup>. Seven disdrometers observed surface rain rates and DSDs

1 while three rain gauges measured rain accumulations (Table 2). The disdrometers and  
 2 rain gauges close to Juelich are used to evaluate radar derived QPE. **Disdrometer**  
 3 **observations at BoXPol which is ~48.5 km away from JuXPol are not taken into**  
 4 **account in Section 3 when statistically analyzing the precipitation over HOPE,**  
 5 **considering the spatial and temporal variability of rainfall.**

6

7 Table 2 Information on rain gauges and disdrometers deployed during HOPE

| Site name | Location<br>(Latitude,<br>Longitude) | Instrument (quantity)             | Temporal<br>resolution<br>(s) | operation period     |
|-----------|--------------------------------------|-----------------------------------|-------------------------------|----------------------|
| KITCube   | (50.90°,6.46°)                       | Joss-Waldvogel<br>disdrometer (1) | 60                            | 1 Apr - 31 May 2013  |
|           |                                      | OTT Parsivel2 (1)                 | 60                            | 1 Apr - 31 May 2013  |
| LACROS    | (50.88°,6.41°)                       | OTT Parsivel2 (1)                 | 30                            | 2 May - 31 May 2013  |
| WTR       | (50.91°,6.41°)                       | OTT Parsivel2 (1)                 | 30                            | 17 Apr - 31 May 2013 |
|           |                                      | OTT Pluvio (1)                    | 10                            | 17 Apr - 31 May 2013 |
| WWTP      | (50.90°,6.40°)                       | OTT Parsivel2 (1)                 | 30                            | 17 Apr - 31 May 2013 |
|           |                                      | Tipping bucket rain<br>gauge (1)  | --                            | 17 Apr - 31 May 2013 |
| Tower     | (50.91°,6.41°)                       | OTT Parsivel1 (1)                 | 30                            | 17 Apr - 31 May 2013 |
|           |                                      | OTT Parsivel2 (1)                 | 30                            | 17 Apr - 31 May 2013 |
|           |                                      | OTT Pluvio (1)                    | 10                            | 17 Apr - 31 May 2013 |
| BoXPol    | (50.73°,7.07°)                       | OTT Parsivel2 (1)                 | 30                            | 1 Apr – 31 May 2013  |
|           |                                      | Thies Disdrometer (2)             | 60                            | 1 Apr – 31 May 2013  |
|           |                                      | OTT Pluvio (1)                    | 60                            | 1 Apr – 31 May 2013  |

1 Three MRRs were deployed close to JOYCE, KITCube and BoXPol. At JOYCE and  
2 KITCube, the MRRs measured vertical DSD profiles with a vertical resolution of 100  
3 m, at BoXPol 150 m. Due to the near field scattering effects, MRR observations at the  
4 first three gates are not used.

5 Radiosondes were launched regularly twice per day at KITCube, one at 1100 UTC  
6 and another at 2300 UTC. Additional radiosondes were launched during intensive  
7 observation periods (IOPs).

### 8 **3. Precipitation during HOPE**

9 We first compare QPE derived from the polarimetric radar observations with the  
10 observations of the surface network of rain gauges and disdrometers, in order to  
11 corroborate the consistency and accuracy of both estimates.

12 Figure 3 shows the daily rain accumulation and precipitation duration averaged over  
13 the rain gauge/disdrometer observation sites in the HOPE region (Fig. 1). For rainfall  
14 duration, only disdrometer observations are used since the weighing-type rain gauges  
15 often indicate small noisy rain-like signals, which prevent accurate information on  
16 rainfall duration. According to these observations, the maximum daily rain  
17 accumulation was  $\sim 14.5$  mm, the total rain accumulation during HOPE was  $\sim 104.8$   
18 mm, and the total rainfall time was  $\sim 144$  hours, i.e., 10% of the total HOPE period.  
19 The rainfall observations at the five locations are in good agreement with each other,  
20 as indicated by the bars in Fig. 3, which show the full range of the observations.

21 According to the disdrometer observations, precipitation during HOPE was not very  
22 intense (Fig. 4). **The distribution of rain intensities was calculated based on individual**  
23 **measurements of disdrometers over the HOPE area.** Rain rates determined at a  
24 temporal resolution of 1 minute were below less than  $2 \text{ mm h}^{-1}$  for more than 88% of  
25 the total precipitation duration, while rain rates above  $5 \text{ mm h}^{-1}$  were observed for less  
26 than 3 hours. Only one hour of rain rates above  $8 \text{ mm h}^{-1}$  did occur.



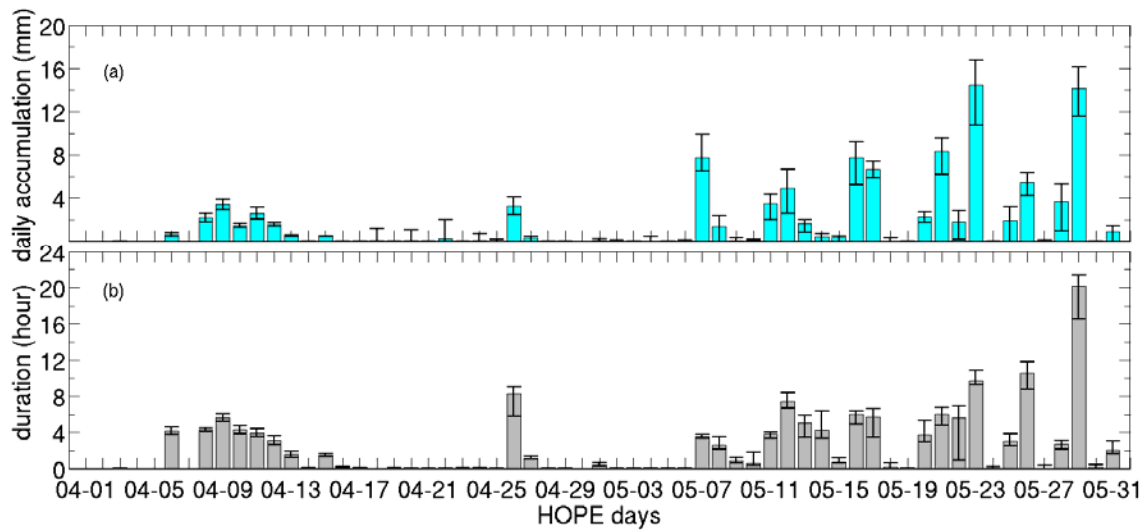

2 Figure 3. (a): Daily rainfall accumulation during HOPE. The height of the columns  
 3 indicates the mean value while the bars indicate the range of the maximum and  
 4 minimum rain accumulations observed by the 3 rain gauges and 7 disdrometers at the  
 5 five station locations (Fig. 1). (b): Daily precipitation duration derived only from the 7  
 6 disdrometers (see discussion in the text). Again the bars denote the range of the  
 7 observations.

8

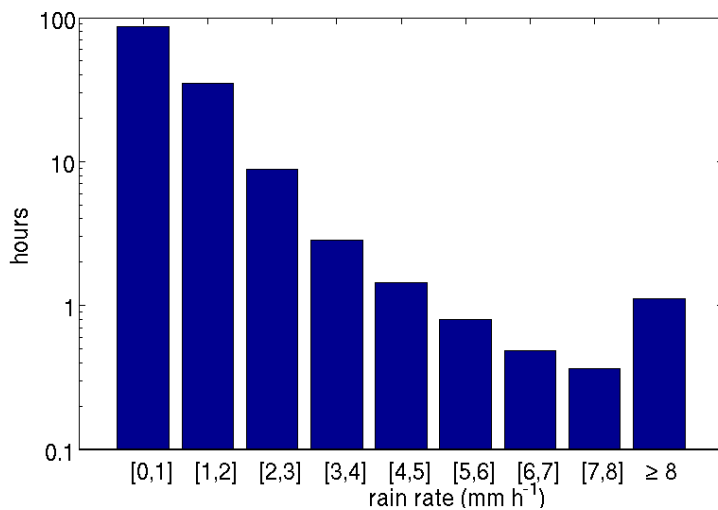

9

10 Figure 4. Distribution of rain intensities observed over one minute by the  
 11 disdrometers in the inner HOPE area.

12

1

2 In accordance with the relatively light rainfall events during HOPE, the polarimetric  
3 radar observables  $Z_{DR}$  and  $K_{DP}$  were low and quite noisy. Under these conditions,  
4 most of the time, we simply used Marshall-Palmer relation for quantitative rainfall  
5 estimations (Marshall and Palmer, 1948),

$$6 \quad Z_H = 200R^{1.5} \quad (\text{or } R = 0.029Z^{0.67}) \quad (1)$$

7 where  $Z_H$  (in  $\text{mm}^6 \text{m}^{-3}$ ) is the radar reflectivity for horizontal polarization in linear  
8 scale and  $R$  is the rain rate in  $\text{mm h}^{-1}$ .

9 Since Equation (1) tends to overestimate stronger rain intensities (Zrnić et al., 2000;  
10 Trömel et al., 2014b), the R- $K_{DP}$  relation is employed for rain rate estimation when  $Z_H$   
11 is above 37 dBZ, i.e., the instantaneous rain rate is above  $8 \text{ mm h}^{-1}$  (Diederich et al.,  
12 2015b; Ryzhkov et al., 2014).  $K_{DP}$  is independent of calibration and unaffected by  
13 attenuation (Ryzhkov et al., 2014). Thus, following Diederich et al. (2015b) and  
14 Ryzhkov et al. (2014), in this case the rain rate is determined by

$$15 \quad R = 16.9K_{DP}^{0.801} \quad \text{if } K_{DP} > 0 \quad (2)$$

16 where  $K_{DP}$  is the specific differential phase ( $^{\circ} \text{ km}^{-1}$ ) and filtered from polarimetric  
17 radar measurements following Hubbert and Bringi (1995).

18 Radar bins with copolar correlation coefficient  $\rho_{HV} < 0.75$  have been neglected in  
19 order to eliminate the ground clutter contamination. For JuXPol and KiXPol,  
20 observations at elevations  $4.5^{\circ}$  and  $3.5^{\circ}$ , respectively, are used to calculate the rain  
21 rates and avoid the possible impacts from a 120-m height meteorological tower at  
22 Forschungszentrum Juelich, while an elevation of  $1^{\circ}$  is chosen for BoXPol rainfall  
23 estimation since the radar beam at longer distance is less affected by the ground  
24 clutter and certainly overshoots the meteorological tower. **Z and  $Z_{DR}$  attenuation along**  
25 **each radial is neglected since the rain intensities were generally low over the HOPE**  
26 **area.** The mean beam diameter of BoXPol over the HOPE area is around 850 m,  
27 which is almost 10 times larger than that of JuXPol and KiXPol, and its beam height

1 (~860 m) is about 2 times larger comparing to JuXPol and KiXPol.

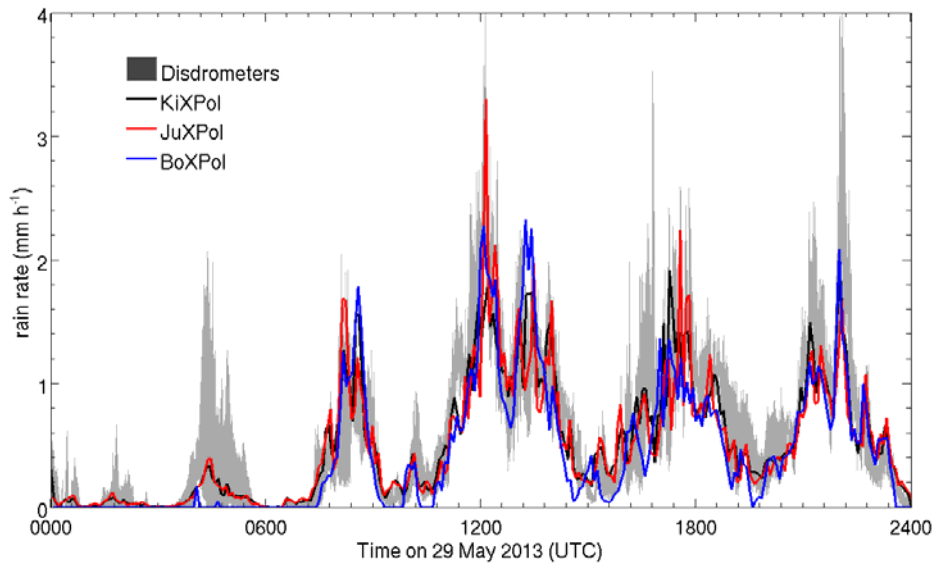

2

3 Figure 5. Time series of rain rates derived from observations of the seven  
4 disdrometers and the three polarimetric radars on 29 May 2013. The shaded gray area  
5 indicates the range of rain rates observed by the disdrometers with 1-min temporal  
6 resolution in the HOPE area while the rain rate from the three polarimetric radar  
7 observations is calculated at the radar gates that are coincident with disdrometer  
8 locations and also averaged over the five disdrometer locations.

9

10 Figure 5 compares as an example the mean rain rates derived from the three X-band  
11 polarimetric radar over the five disdrometer locations with the disdrometer  
12 observations for 29 May 2013. Precipitation fell intermittently with five more intense  
13 periods separated by short periods of no or very low rain rates and maximum rain  
14 rates between 1 and 3 mm h<sup>-1</sup>. In general, the variability of the radar-derived surface  
15 precipitation matches very well the disdrometer measurements. **JuXPol and KiXPol**  
16 **are in a better agreement with the surface measurements than BoXPol for the very low**  
17 **rain rates, which probably suffers from the effects of non-uniform beam filling effects**  
18 **due to the much larger distance from the HOPE area (Giangrande and Ryzhkov, 2008)**  
19 **and higher altitude of sampling volume of BoXPol.**

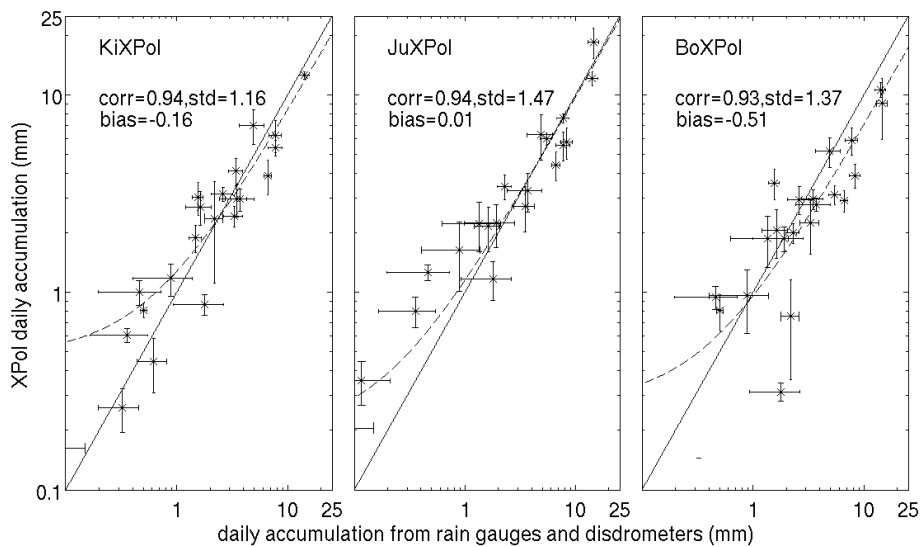

1

2 Figure 6. Mean daily radar-derived rain accumulation over the disdrometer/rain  
 3 gauge locations, compared to the surface precipitation observed by the rain gauges  
 4 and disdrometers in the HOPE area. The bars indicate the standard deviation of the  
 5 estimates from the particular radar (vertical bars) and from the surface observations  
 6 (horizontal bars) . The dashed black line is the best linear fit of the daily rain  
 7 accumulation on the logarithmic scale while the solid black line is the 1:1 line.

8

9 Daily-accumulated rainfall estimated by the three polarimetric radars are compared  
 10 with the observations of rain gauges and disdrometers in Fig. 6. Both estimates are  
 11 very consistent as indicated by correlations above 0.93. As for 29 May 2013, BoXPol  
 12 estimates result in lower daily accumulations than for the other two radars, **again**  
 13 **probably caused by beam broadening (Giangrande and Ryzhkov, 2008) and high**  
 14 **altitude of sampling volume of BoXPol over the HOPE area.**

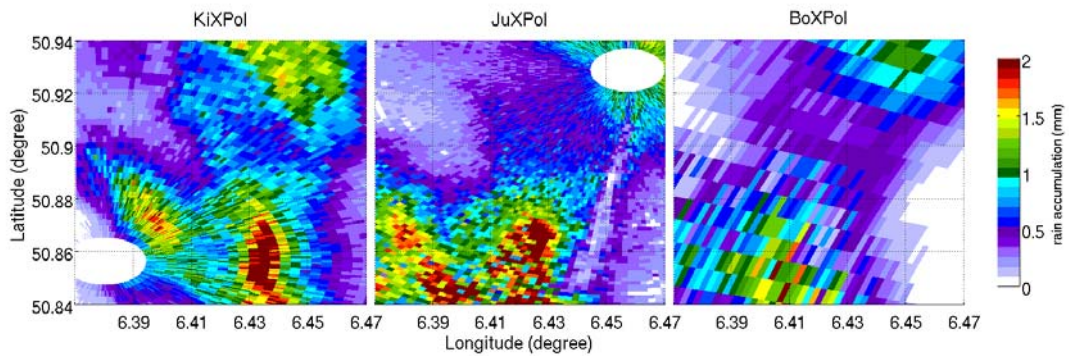

1

2 Figure 7. Rain accumulation over the HOPE area between 0830 and 0900 UTC (6  
 3 PPIs) on 29 May 2013 observed by the three polarimetric radars.

4

5 With a range resolution of 150/250 m and a beam diameter of approximately 87/850  
 6 m over the HOPE area, the three polarimetric radars allow to characterize the  
 7 precipitation patterns in the HOPE domain in high resolution, which will be important  
 8 for model evaluation. A 30-min rain accumulation over the inner HOPE area on 29  
 9 May 2013 shows that, the three radar estimates result in an overall agreement of the  
 10 rough precipitation pattern (Figure 7). However, when we zoomed into details and  
 11 noticed also the minor differences between these patterns, e.g., lower precipitation  
 12 observed by BoXPol and missing pixels near KiXPol and JuXPol. Bins close to  
 13 KiXPol and JuXPol were contaminated by ground clutters while the beam broadening  
 14 and height at the larger ranges deteriorates the similarity between the BoXPol and  
 15 KiXPol/JuXPol estimates (Fig. 7). The different radar observation scenarios, i.e., at an  
 16 elevation of 4.5° JuXPol reaches 750 m above KiXPol and the time differences  
 17 between the two radar measurements are up to 5 min, also needs to be considered. A  
 18 combination of the three radar observations will definitely be an advantage to  
 19 reconstruct the precipitation patterns over the HOPE area in a future study. Since no  
 20 adjustments of the  $R-Z_H$  and  $R-K_{DP}$  relations were made, these results are very  
 21 promising. The three radar estimates together with the direct comparisons with the  
 22 rain gauges and disdrometers allow to attribute robust error estimates to these  
 23 precipitation fields, which will be valuable when compared with model simulations.

1 **4. Observed microphysical processes**

2 Falling hydrometeors are subject to growth and/or depletion by a range of  
3 microphysical processes which leave their fingerprints in the spatial and temporal  
4 evolution of several polarimetric moments. Since microphysical processes are  
5 simulated in atmospheric models with increasing details, polarimetric radar  
6 observations can be used for model validations and thus spur further improvements.  
7 In this section we present three cases, where such microphysical processes could be  
8 observed by the radars and substantiated by MRR and disdrometer observations.

9 **4.1 Case 1: Size sorting and coalescence**

10 On 26 Apr 2013, a cold front passed over Germany, which came with a large band of  
11 stratiform rain that persisted from the morning hours until the end of the day. The  
12 daily rain accumulation recorded by the surface observations was about 3.5 mm while  
13 the precipitation lasted up to 8 hours (Fig. 3). Six radiosondes launched at KITCube at  
14 0700 UTC, 0900 UTC, 1100 UTC, 1300UTC, 1600 UTC and 2300 UTC, respectively,  
15 recorded a freezing level above 2100 m during daytime, which descended down to  
16 830 m at about 2300 UTC.

17

18

19

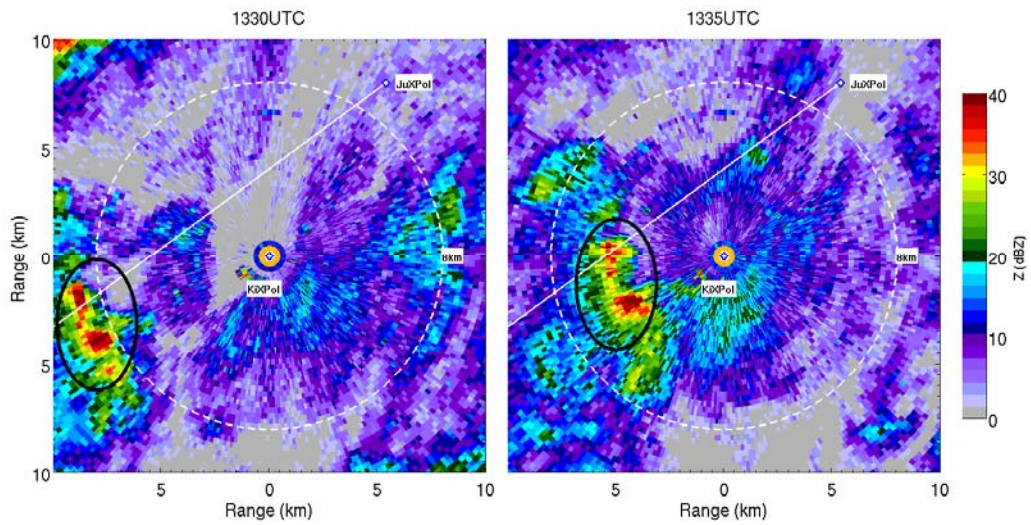

1

2 Figure 8. Reflectivity ( $Z_H$ ) of KiXPol observed at an elevation angle of  $3.5^\circ$  at 1330  
 3 UTC and 1335 UTC on 26 April 2013. The precipitating cell examined in the text is  
 4 highlighted by the black ellipse. The white solid line indicates the azimuth direction  
 5 of the JuXPol RHIs, while the white dashed circle delineates the 8-km distance from  
 6 KiXPol.

7

8 KiXPol performed volume scans every 5 min on that day, with scan elevations  
 9 ranging from  $0.6^\circ$  to  $30^\circ$  (Table 1), while JuXPol made RHI scans in the direction of  
 10 JOYCE every minute.

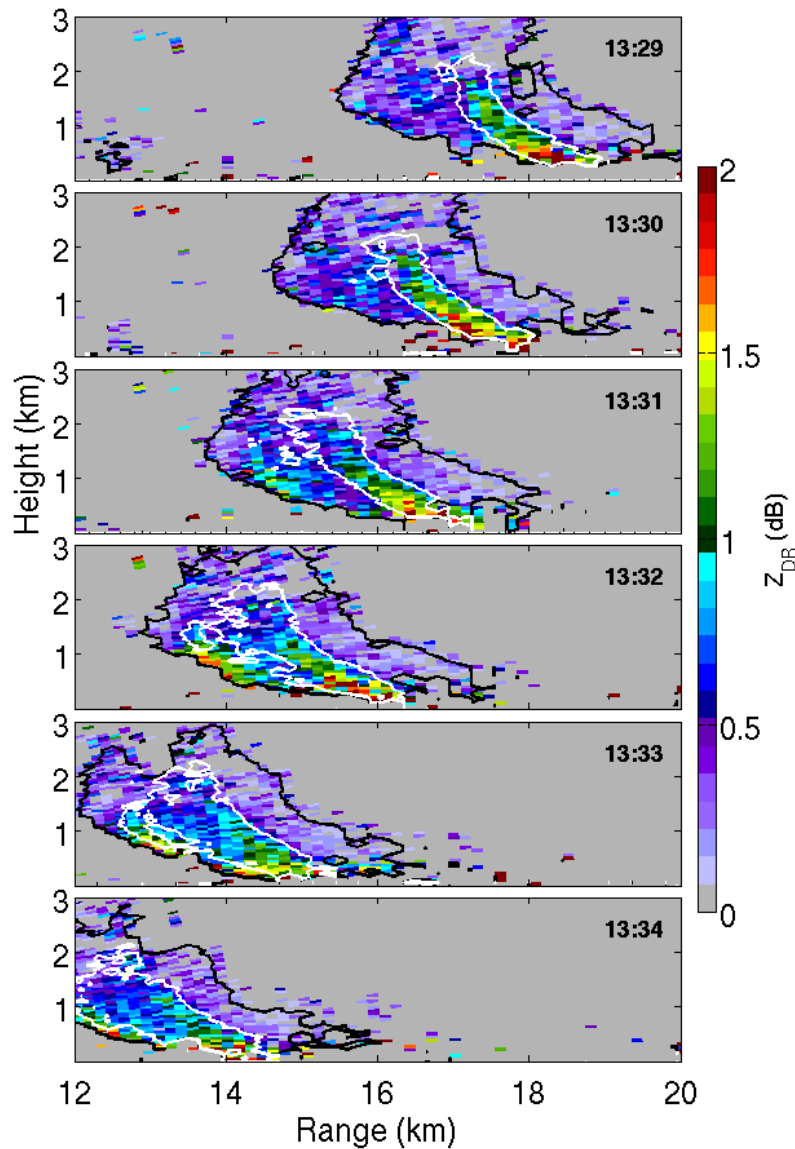

1

2 Figure 9. Sequence of RHIs of differential reflectivity ( $Z_{DR}$ ) measured by JuXPol at  
 3 an azimuth angle of  $233.7^\circ$  between 1329 UTC and 1334 UTC on 26 April 2013  
 4 (from top to bottom). The contour lines indicate reflectivity values ( $Z_H$ ) of 15 dBZ  
 5 (black) and 30 dBZ (white), respectively.

6

7 At 1330 UTC KiXPol observed a precipitating cell approaching the radar from the  
 8 southwest at about 10 km distance, which was moving towards JuXPol (Fig. 8). At  
 9 1335 UTC the cell was within 8 km from KiXPol, where it started to dissolve (not  
 10 shown). RHIs performed with JuXPol at the azimuth direction  $233.7^\circ$  nicely tracked



1 the approaching cell (Fig. 9).  
 2 The high temporal resolution of the JuXPoL RHIs allows for a detailed insight into the  
 3 evolution of the precipitating cell. The cell was first observed by JuXPoL at 1300 UTC  
 4 at about 45 km distance and kept moving towards JuXPoL with low reflectivities at  
 5 about 20 dB (not shown). At 1329 UTC, JuXPoL detected the precipitating cell  
 6 entering its RHI at 20 km range (Fig. 9). In the center of the precipitating cell tilted  
 7 towards the northeast by the wind shear (See Fig. 10), near surface  $Z_{DR}$  values were  
 8 up to 2 dB while  $Z_H$  was above 30 dBZ.  $Z_{DR}$  increases towards the ground concurrent  
 9 with an increasing  $Z_H$ . This behavior is a clear sign of coalescence, which shifts small  
 10 raindrops to larger sizes and increases the mean raindrop size (Kumjian and Prat,  
 11 2014).

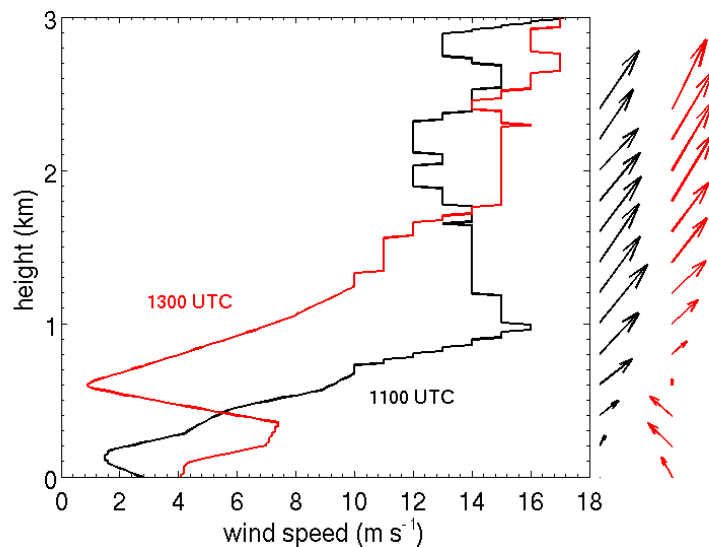

12  
 13 Figure 10 Wind profiles derived from radiosondes launched at KITCube at 1100 UTC  
 14 and 1300 UTC. The arrows on the right indicate the wind vector ( $0^\circ$  indicates the  
 15 north) while their lengths are proportional to wind speed.

16  
 17 While moving towards JuXPoL, the tilt of the cell led to a concentration of large rain  
 18 drops at the leading edge of the precipitating cell, where their larger fall speed  
 19 separates them from the smaller droplets which largely remain in the flow volume

1 (e.g., Kumjian and Ryzhkov (2012)). From 1329 UTC to 1330 UTC,  $Z_{DR}$  at the  
2 leading edge of the cell is below 0.5 dB (Fig. 9). At 1331 UTC,  $Z_{DR}$  begins increasing  
3 and later on reaches up to 2 dB while  $Z_H$  remains in the order of 15 dBZ in that region.  
4 When the cell begins to dissipate as it moves forward,  $Z_{DR}$  decreases down to  $\sim 1$  dB  
5 both in the center and upstream of the precipitating cell.

#### 6 **4.2 Case 2: Size sorting due to vertical wind shear**

7 A second case on size sorting caused by the vertical wind shear was well captured by  
8 BoXPol on 17 May 2013. A deep low pressure system reaching from the surface up to  
9 200 hPa was found over the Northeast Atlantic and the British Isles on the previous  
10 day, while a surface low was moving from the western Mediterranean to the north,  
11 towards central Europe. As a result a complex pattern of fronts was affecting France  
12 and Germany due to the interaction of both systems. On 17 May 2013, a stationary  
13 front along with a through of warm air aloft passed over West Germany, moving  
14 eastwards. Low atmosphere levels were characterized by high humidity and a sharp  
15 West-East temperature gradient. A band of mostly stratiform rain affected  
16 south-western and western Germany earlier in the day, while later on convective rain  
17 with lightning activity developed over south east and central Germany. About 8 mm  
18 of rain accumulated over 6 hour time spans as recorded by the disdrometers (Fig. 3).

19

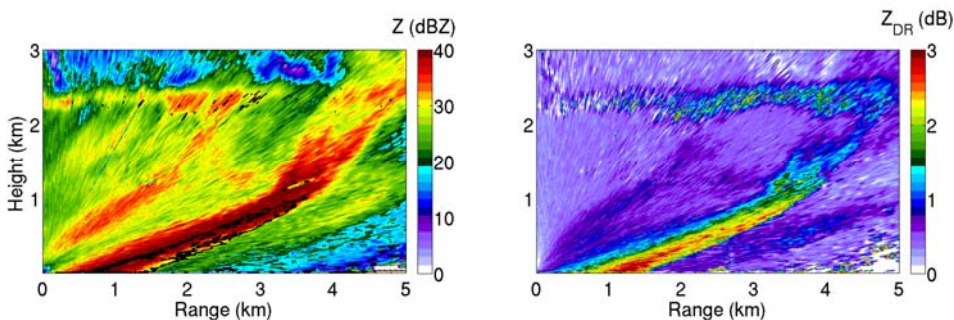

21 Figure 11. Reflectivity ( $Z_H$ , left) and differential reflectivity ( $Z_{DR}$ , right) observed by  
22 BoXPol at an azimuth angle of  $290^\circ$  at 1240 UTC on 17 May 2013. The black isoline  
23 in the left panel indicates the 2-dB  $Z_{DR}$  contour line.

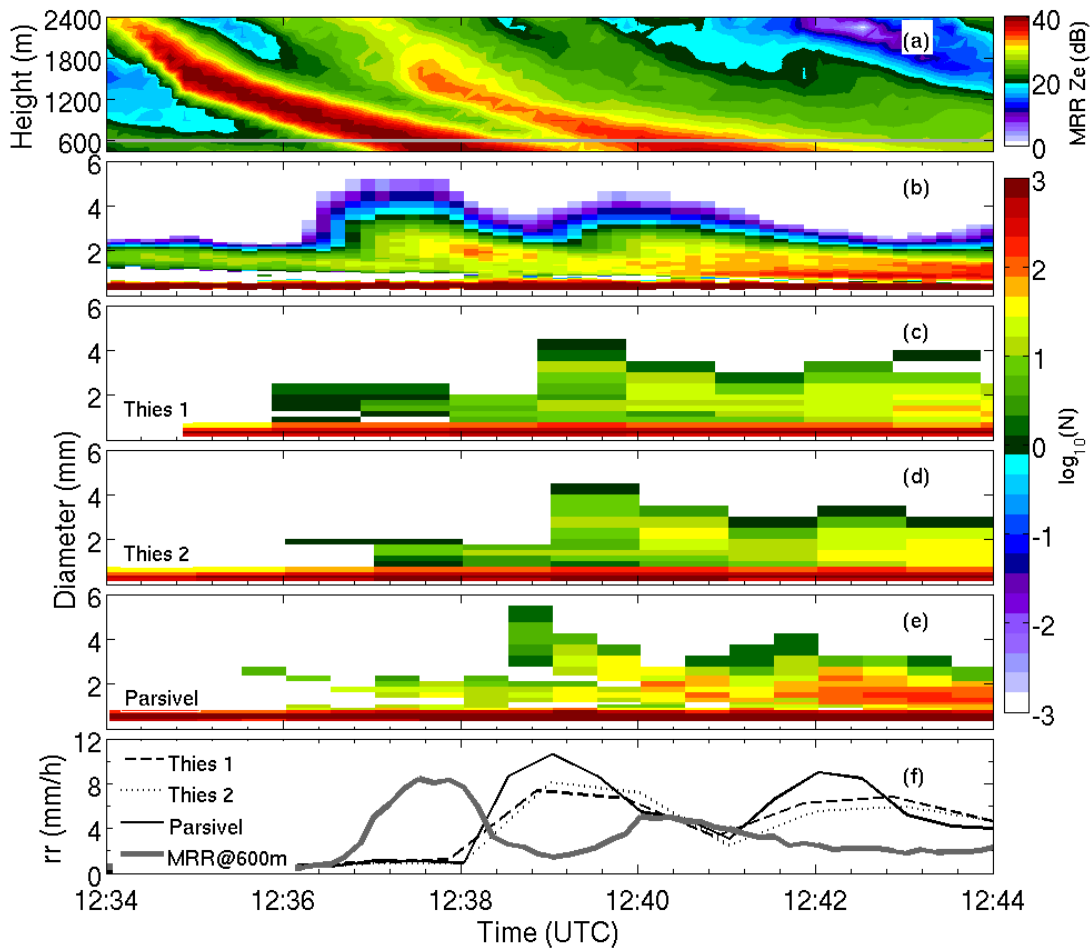

1

2 Figure 12. Different instrument observations located within distances of 5 meters  
 3 close (200 m) to the BoXPoI location in Bonn, Germany, between 1234 UTC and  
 4 1244 UTC on 17 May 2013. (a): Reflectivity observed by vertically pointing micro  
 5 rain radar (MRR). The grey horizontal solid line indicates the 600 m height level. (b):  
 6 MRR-observed DSDs at 600 m altitude. (c) DSDs observed by a Thies disdrometer  
 7 with its transmitter and receiver line pointing along the east-west direction (Thies 1);  
 8 (d) same as (c) but for a Thies disdrometer pointing along the south-north direction  
 9 (Thies 2); (e) Same as (c) except for an OTT Parsivel disdrometer; (f) Rain rate  
 10 observed by an MRR at 600 m height and the three disdrometers collocated with the  
 11 MRR at the BoXPoI station.

12

1 The precipitating cell moving westwards was captured by the BoXPol RHI scan. The  
2 melting layer can be easily identified by the enhanced  $Z_H$  and  $Z_{DR}$  at an altitude of  
3  $\sim 2.2$  km in the RHI performed at an azimuth angle of  $290^\circ$  (Fig. 11). Similar to the  
4 first case presented above, the strong  $Z_{DR}$  at the leading edge indicates the increase of  
5 mean raindrop size due to the accumulation of large raindrops by size sorting.

6 At 200 m distance from BoXPol, vertical profiles of DSDs were observed by an MRR.  
7 Figure 12 shows the time series of MRR-derived reflectivity (Panel a) with the  
8 corresponding DSDs at an altitude of 600 m (Panel b). The first cell of a precipitation  
9 system passed BoXPol and the MRR before 1240 UTC with reflectivities up to 40  
10 dBZ in the center, followed by a second peak with reflectivities up to 35 dBZ (Fig.  
11 12a). The derived DSDs indicate that, fast falling large raindrops tend to concentrate  
12 at the upstream side of the cell, while raindrops less than 3 mm in diameter have a  
13 larger number concentration downstream (Fig. 12b). **However, the coarse temporal**  
14 **resolution of BoXPol RHI scans (every 5 min) makes it difficult to compare directly**  
15 **the MRR observations with BoXPol over the MRR site.**

16 The OTT Parsivel and Thies optical laser disdrometers collocated with the MRR also  
17 captured the precipitation event on that day (Fig. 12c-12f). One Thies disdrometer  
18 was deployed with its transmitter-receiver line in the west-east direction (Thies 1) and  
19 the other in the south-north direction (Thies 2). For the surface DSDs shown in Fig.  
20 12b-12e, the largest raindrops collected by the two Thies disdrometers are below 4  
21 mm after 1239 UTC. Similar to MRR observations, however, the Parsivel observed  
22 larger raindrops up to 5 mm at an earlier time step since it was operated at a temporal  
23 resolution of 30 s. It implies that a temporal resolution of better than 1 min is required  
24 to better interpret the DSD evolution caused by size sorting due to vertical wind shear  
25 and to improve the surface rainfall estimations.

26 The surface rain rates observed by the three disdrometers differ from the MRR  
27 observations at 600 m considering the spatial and temporal shifts (approximately 2  
28 min) (Fig. 12f). The maximum rain rate estimated from the MRR at 600 m is  $\sim 8$  mm  
29  $h^{-1}$  at 1238 UTC, with a second peak of  $\sim 6$  mm  $h^{-1}$  at 1240 UTC. **Considering the**

1 effects from size sorting and other possible microphysical processes, the rain rate at  
2 high altitudes is usually higher than on the surface. The two Thies disdrometers close  
3 to the Parsivel, which provide measurements at 1 min time interval, also show a  
4 smaller maximum rain rate near the ground. We thus conclude that the Parsivel is  
5 overestimating the rain rate (Fig. 12f). Nevertheless, these observations are consistent  
6 with the occurrence of the size sorting process shown from the radar observations..

### 7 **4.3 Case 3: Riming/aggregation processes observed by JuXPol**

8 On 29 May 2013 a cut-off process was underway over western and middle Europe,  
9 resulting in a broad and well defined upper level vortex. At lower levels the pressure  
10 distribution was more complex with several small surface lows and generally weak  
11 pressure gradients. One of these surface lows, initially situated over southern England  
12 at 0000 UTC, moved to eastern France during the day. The corresponding cold front  
13 became quasi-stationary, as indicated by a sharp  $\theta_e$  (equivalent potential temperature)  
14 gradient over Be-Ne-Lux and western Germany (not shown). At 0000 UTC and 0600  
15 UTC frontogenetic forcing was strongest due to deformational processes in the  
16 vicinity of the front as it interacted with a second low over the northern half over  
17 Germany. This resulted in a subsequent reinforcement of frontal precipitation over the  
18 HOPE area until 1200 UTC. During and after that intensification period the frontal  
19 temperature gradient gradually dissolved due to evaporative cooling and the advection  
20 of a colder maritime air mass also on the warm side of the front. As a consequence  
21 frontal precipitation weakened by the end of the day.

22 The daily rain accumulation for 29 May 2013 recorded by the surface observations  
23 was ~14 mm while precipitation lasted up to 20 hours (Fig. 3): this was the day with  
24 the longest rainy period which also lead to the second largest daily rain accumulation  
25 during HOPE. Three radiosondes were launched at the location of KITCube, one at  
26 2300 UTC on 28 May and two at 1100 UTC and 2300 UTC on 29 May. According to  
27 the soundings, the freezing level was located at ~2.2 km at 2300 UTC on 28 May  
28 2013 and subsided down to ~1.7 km at 1100 UTC on 29 May 2013.

1 Figure 13 shows so-called Quasi-Vertical Profiles (QVPs) of  $Z_H$ ,  $Z_{DR}$ ,  $\rho_{HV}$  and  $K_{DP}$   
 2 based on JuXPoI measurements at  $18^\circ$  elevation angle between 0600 and 1430 UTC.  
 3 QVPs were first used by Trömel et al. (2014a) to reliably estimate backscatter  
 4 differential phase and Ryzhkov et al. (2016) further expanded the QVP  
 5 methodology and demonstrated its multiple benefits. The QVPs of polarimetric  
 6 variables are obtained by azimuthal averaging of the radar data collected during  
 7 conical PPI scans at higher antenna elevation angles in order to reduce statistical  
 8 errors of the variables and assign their average vertical profiles to a conical volume in  
 9 a time-height display. QVPs are especially beneficial for monitoring the temporal  
 10 evolution of microphysical processes active on a larger scale.

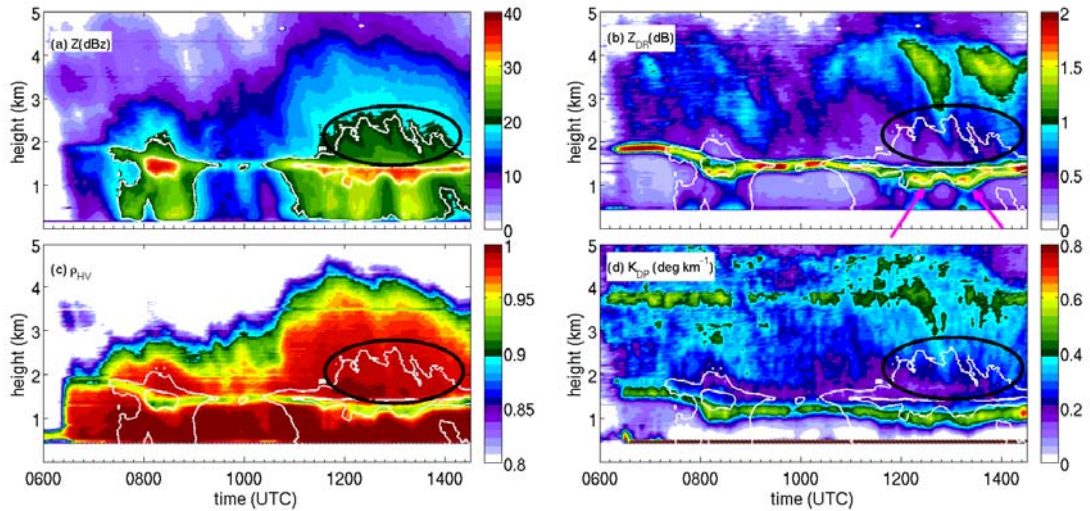

11  
 12 Figure 13. (a) Time series of Quasi-Vertical Profiles (QVPs) of  $Z_H$  derived from  
 13 PPIs measured with JuXPoI at  $18^\circ$  elevation on 29 May 2013 between 0600UTC and  
 14 1430UTC. The white lines indicate the 20 and 30 dBZ contours of  $Z_H$ ; (b), (c) and (d):  
 15 the same time series as (a) but for  $Z_{DR}$ ,  $\rho_{HV}$  and  $K_{DP}$ , respectively. The black ellipses  
 16 highlight the area for aggregation/riming while the magenta arrows in Panel (b)  
 17 indicate the  $Z_{DR}$  saggings (see text for detail).

18  
 19 The most striking feature in Fig. 13 is the descent of the melting layer from 1.8 km  
 20 down to  $\sim 1.5$  km height between 0700 and 0900 UTC. After 1200 UTC, a region of  
 21 enhanced  $K_{DP}$  above 3.5 km accompanied with  $Z_{DR} > 1.2$  dB aloft can be identified.

1 Bands of enhanced  $Z_{DR}$  and bands of enhanced  $K_{DP}$  are both considered as signatures  
2 of dendritic growth (Kennedy and Rutledge, 2011). According to the radiosonde  
3 ascending at 1100 UTC, the temperature zone of  $-10^{\circ}\text{C} \sim -15^{\circ}\text{C}$  which favors the  
4 growth of ice dendrites is located between 3.8 and 4.7 km. Thus, we may suspect  
5 dendrites growing above 3.5 km especially after 1200 UTC (Fig. 13).

6 When following the height evolution of polarimetric variable structures above the  
7 melting layer (ML) after 1200 UTC (Fig. 13), riming/aggregation processes are  
8 indicated by enhancements of  $Z_H$  and  $\rho_{HV}$  above the ML while  $Z_{DR}$  and  $K_{DP}$  decrease  
9 with height in unison above the ML after 1200 UTC (ellipses in Fig. 13).  $Z_{DR}$  and  $K_{DP}$   
10 depressions aloft associated with increases in  $Z_H$  and  $\rho_{HV}$  above the ML suggest  
11 increases of ice particle mean sizes due to riming and/or aggregation. Recently,  
12 Moisseev et al. (2015) argued that the processes responsible for enhanced  $K_{DP}$ - and  
13  $Z_{DR}$ -bands might be different: they advocated that the  $K_{DP}$  bands are caused by high  
14 number concentrations of oblate relatively dense ice particles (early aggregates) and  
15 are linked to the onset of aggregation processes, while  $Z_{DR}$  bands in the absence of  
16  $K_{DP}$  bands are observed when crystal growth is the dominating snow growth  
17 mechanism and the number concentration is lower. Following their arguments, it can  
18 also be speculated that aggregation processes are ongoing near the end of the  
19 observation period shown in Fig. 13.

20 Discrimination between riming and aggregation is important for aviation security,  
21 since riming implies the existence of supercooled liquid water above the freezing  
22 level, which could result in dangerous icing on aircrafts. Riming is also associated  
23 with embedded updrafts, convective development and thus precipitation enhancement.  
24 In the presence of such updrafts, enhanced condensation of water vapor occurs and  
25 leads to small liquid droplets which may be accreted by dry snowflakes. These rimed  
26 snowflakes may grow fast and reach large sizes with higher terminal velocity before  
27 they fall through the ML. Due to their enhanced terminal velocity, they melt at a  
28 lower height and lead to the “sagging” signature of the bright band in terms of  $Z_{DR}$   
29 and  $\rho_{HV}$  (Ryzhkov et al., 2016).

1 In Fig. 13, reduced  $Z_{DR}$  combined with enhanced  $Z_H$  and  $Z_{HV}$  above the ML occurs at  
2 times, and also “sagging” signatures are clearly visible at around 1200 UTC and 1300  
3 UTC (the magenta arrows in Fig. 13b). Starting from the bottom of the  $Z_{DR}$ - and  $K_{DP}$ -  
4 bands at about 3 km height at 1200 UTC,  $Z_{DR}$  decreases and  $Z$  increases downwards  
5 most probably due to aggregation and/or riming. Here  $Z_{DR}$  reduces down to a few  
6 tenths of a dB just above the level where melting starts. However, this reduction is  
7 expected to be more intense for riming than for aggregation. Riming makes the ice  
8 particles more spherical leading to a lower  $Z_{DR}$  by 0.1 – 0.3 dB (Ryzhkov et al., 2016).  
9 Thus, we speculate that riming causes the “sagging” effects of  $Z_{DR}$  and  $Z_{HV}$   
10 combined with relatively low  $Z_{DR}$  above the ML around 1200 UTC and 1300 UTC. To  
11 more reliably distinguish between riming and aggregation, we require additional  
12 measurements indicative e.g. of associated updrafts and supercooled liquid water  
13 above ML, which could be provided by additional microwave radiometers and cloud  
14 radars.

15 The discussed examples have clearly shown how polarimetric radars can be used to  
16 identify and distinguish between different microphysical processes, like warm rain  
17 processes and ice particle formation and growth. Converting the output of NWP  
18 models into polarimetric radar variables and using a polarimetric forward radar  
19 operator would provide an opportunity to validate the representation of the discussed  
20 microphysical processes in such models.

21

## 22 **5. Conclusions**

23 This study presents a summary of rainfall observations and some examples of related  
24 microphysical processes occurring during HOPE between 1 April and 31 May 2013.  
25 At that time three X-band polarimetric Doppler radars observing the central HOPE  
26 area of about 5 km×5 km over which a surface network of rain gauges, disdrometers  
27 and MRRs was deployed to assess the accuracy of the radar-based precipitation  
28 observations and to demonstrate the capability of polarimetric radars to detect



1 microphysical processes. Rainfall accumulations at the daily and even hourly scale  
2 were surprisingly consistent between the different observations demonstrating the  
3 high quality of QPE based on R-Z and R- $K_{DP}$  relations at least for the low intensity  
4 rainfall events prevalent during HOPE.

5 The combined observations of polarimetric radars and collocated instruments  
6 demonstrated the ability of radar polarimetry to detect several microphysical  
7 processes by so-called polarimetric fingerprints during the development and evolution  
8 of precipitation systems. These fingerprints clearly identify microphysical processes  
9 like coalescence, size sorting and riming/aggregation. Size sorting by wind shear was  
10 e.g. well captured by the JuXPol and BoXPol RHI scans and corroborated by the  
11 collocated MRR and disdrometer observations. **While there were clear signs of other  
12 processes like riming and aggregation, a distinction between these two processes is  
13 still difficult with the available observations. Doppler velocities at the vertical  
14 pointing mode were analyzed but the observed values (between 1 - 2 m/s) still makes  
15 the distinction ambiguous. Furthermore, the exact time from the QVP and vertical  
16 pointing scans cannot be matched, and one has to be careful when comparing the QVP  
17 with vertical scans. Additional analysis in conjunction with other independent  
18 observations e.g. from microwave radiometers, lidars and cloud radars which were  
19 deployed at the JOYCE site is also required for a better distinction between riming  
20 and aggregation, which is the focus of an ongoing study.**

21

## 22 **Acknowledgements**

23 This research was funded by the Federal Ministry of Education and Research in  
24 Germany (BMBF) through the research programme “High Definition Clouds and  
25 Precipitation for Climate Prediction - HD(CP)<sup>2</sup>” (FKZ: 01LK1219A and 01LK1210A).  
26 We thank Martin Lennefer and Kai Muehlbauer at University of Bonn and the  
27 SFB/TR 32 (Transregional Collaborative Research Center 32, <http://www.tr32.de/>)  
28 funded by the German Research Foundation (DFG) for maintaining the instruments

1 and make the radar data available. We thank Patric Seifert from the Leibniz Institute  
2 for Tropospheric Research (TROPOS) for providing the OTT Parsivel data at the  
3 LACROS station. We also acknowledge Norbert Kalthoff and his colleagues from  
4 Karlsruhe Institute of Technology (KIT) for providing KiXPol observations and the  
5 observation data at KITCube station during HOPE.

6

## 7 **References**

- 8 Andric, J., Kumjian, M. R., Zrnica, D. S., Straka, J. M., and Melnikov, V. M.:  
9 Polarimetric signature above the melting layer in winter storms: An observational  
10 and modeling study, *J. Appl. Meteor. Climatol.*, 52, 682-700, 2013.
- 11 Bechini, R., Baldini, L., and Chandrasekar, V.: Polarimetric Radar Observations in the  
12 Ice Region of Precipitating Clouds at C-Band and X-Band Radar Frequencies, *J.*  
13 *Appl. Meteor. Climatol.*, 52, 1147-1169, 10.1175/jamc-d-12-055.1, 2013.
- 14 Brandes, E. A., Zhang, G., and Vivekanandan, J.: Experiments in Rainfall Estimation  
15 with a Polarimetric Radar in a Subtropical Environment, *J. Appl. Meteor.*, 41,  
16 674-685, 2002.
- 17 Diederich, M., Ryzhkov, A., Simmer, C., Zhang, P., and Trömel, S.: Use of Specific  
18 Attenuation for Rainfall Measurement at X-Band Radar Wavelengths. Part I:  
19 Radar Calibration and Partial Beam Blockage Estimation, *J. Hydrometeorol.*, 16,  
20 487-502, 10.1175/jhm-d-14-0066.1, 2015a.
- 21 Diederich, M., Ryzhkov, A., Simmer, C., Zhang, P., and Trömel, S.: Use of Specific  
22 Attenuation for Rainfall Measurement at X-Band Radar Wavelengths. Part II:  
23 Rainfall Estimates and Comparison with Rain Gauges, *J. Hydrometeorol.*, 16,  
24 503-516, 10.1175/jhm-d-14-0067.1, 2015b.
- 25 Giangrande, S. E., Krause, J. M., and Ryzhkov, A. V.: Automatic Designation of the  
26 Melting Layer with a Polarimetric Prototype of the WSR-88D Radar, *J. Appl.*  
27 *Meteor. Climatol.*, 47, 1354-1364, 10.1175/2007jamc1634.1, 2008.
- 28 Giangrande, S. E., and Ryzhkov, A. V.: Estimation of Rainfall Based on the Results of  
29 Polarimetric Echo Classification, *J. Appl. Meteor. Climatol.*, 47, 2445-2462,

1 10.1175/2008jamc1753.1, 2008.

2 Hubbert, J., and Bringi, V. N.: An Iterative Filtering Technique for the Analysis of  
3 Copolar Differential Phase and Dual-Frequency Radar Measurements, *J. Atmos.*  
4 *Oceanic Technol.*, 12, 643-648,  
5 10.1175/1520-0426(1995)012<0643:aifft>2.0.co;2, 1995.

6 Kalthoff, N., Adler, B., Wieser, A., Kohler, M., Träumner, K., Handwerker, J.,  
7 Corsmeier, U., Khodayar, S., Lambert, D., Kopmann, A., Kunka, N., Dick, G.,  
8 Ramatschi, M., Wickert, J., and Kottmeier, C.: KITcube – a mobile observation  
9 platform for convection studies deployed during HyMeX, *Meteor. Z.*, 22,  
10 633-647, 10.1127/0941-2948/2013/0542, 2013.

11 Kennedy, P. C., and Rutledge, S. A.: S-Band Dual-Polarization Radar Observations of  
12 Winter Storms, *J. Appl. Meteor. Climatol.*, 50, 844-858, 10.1175/2010jamc2558.1,  
13 2011.

14 Kumjian, M. R., and Ryzhkov, A. V.: The Impact of Evaporation on Polarimetric  
15 Characteristics of Rain: Theoretical Model and Practical Implications, *J. Appl.*  
16 *Meteor. Climatol.*, 49, 1247-1267, 10.1175/2010JAMC2243.1, 2010.

17 Kumjian, M. R., Ganson, S. M., and Ryzhkov, A. V.: Freezing of Raindrops in Deep  
18 Convective Updrafts: A Microphysical and Polarimetric Model, *J. Atmos. Sci.*, 69,  
19 3471-3490, 10.1175/JAS-D-12-067.1, 2012.

20 Kumjian, M. R., and Ryzhkov, A. V.: The Impact of Size Sorting on the Polarimetric  
21 Radar Variables, *J. Atmos. Sci.*, 69, 2042-2060, 10.1175/JAS-D-11-0125.1, 2012.

22 Kumjian, M. R., and Prat, O. P.: The Impact of Raindrop Collisional Processes on the  
23 Polarimetric Radar Variables, *J. Atmos. Sci.*, 71, 3052-3067,  
24 10.1175/JAS-D-13-0357.1, 2014.

25 Löhnert, U., Schween, J. H., Acquistapace, C., Ebell, K., Maahn, M., Barrera-Verdejo,  
26 M., Hirsikko, A., Bohn, B., Knaps, A., O'Connor, E., Simmer, C., Wahner, A.,  
27 and Crewell, S.: JOYCE: Jülich Observatory for Cloud Evolution, *B. Amer.*  
28 *Meteor. Soc.*, 96, 1157-1174, 10.1175/bams-d-14-00105.1, 2015.

29 Li, X., and Srivastava, R. C.: An Analytical Solution for Raindrop Evaporation and Its

1 Application to Radar Rainfall Measurements, *J. Appl. Meteorol*, 40, 1607-1616,  
2 2001.

3 Marshall, J. S., and Palmer, W. M. K.: The Distribution of Raindrops with Size, *J.*  
4 *Meteorol.*, 5, 165-166, 10.1175/1520-0469(1948)005<0165:tdorws>2.0.co;2,  
5 1948.

6 Moisseev, D. N., S. Lautaportti, J. Tyynela, and S. Lim: Dual-polarization radar  
7 signatures in snowstorms: role of snowflake aggregation, *J. Geophys. Res.*,  
8 10.1002/2015JD023884.

9 Ryzhkov, A., Diederich, M., Zhang, P., and Simmer, C.: Potential Utilization of  
10 Specific Attenuation for Rainfall Estimation, Mitigation of Partial Beam  
11 Blockage, and Radar Networking, *J. Atmos. Oceanic Technol.*, 31, 599-619,  
12 10.1175/jtech-d-13-00038.1, 2014.

13 Ryzhkov, A., Zhang, P., Reeves, H., Kumjian, M., Tschallener, T., Simmer, C. and  
14 Trömel, S.: Quasi-vertical profiles - a new way to look at polarimetric radar data,  
15 Accepted for publication in *J. Atmos. Oceanic Technol.*, 2016.

16 Ryzhkov, A. V., and Zrnica, D. S.: Discrimination between Rain and Snow with a  
17 Polarimetric Radar, *J. Appl. Meteorol*, 37, 1228-1240,  
18 10.1175/1520-0450(1998)037<1228:dbrasw>2.0.co;2, 1998.

19 Simmer, C., Masbou, M., Thiele-Eich, I., Amelung, W., Bogen, H., Crewell, S.,  
20 Dieckkrüger, B., Ewert, F., Franssen, H.-J. H., Huisman, J. A., Kemna, A.,  
21 Klitzsch, N., Kollet, S., Langensiepen, M., Löhnert, U., Mostaqimur Rahman, A.  
22 S. M., Rascher, U., Schneider, K., Schween, J., Shao, Y., Shrestha, P., Stiebler,  
23 M., Sulis, M., Vanderborght, J., Vereecken, H., van der Kruk, J., Waldhoff, G.,  
24 and Zerenner, T.: Monitoring and Modeling the Terrestrial System from Pores to  
25 Catchments – the Transregional Collaborative Research Center on Patterns in the  
26 Soil-Vegetation-Atmosphere System, *B. Amer. Meteor. Soc.*, 96, 1765–1786,  
27 10.1175/bams-d-13-00134.1, 2015.

28 Trömel, S., Ryzhkov, A. V., Zhang, P., and Simmer, C.: Investigations of Backscatter  
29 Differential Phase in the Melting Layer, *J. Appl. Meteorol. Climatol.*, 53,

1 2344-2359, 10.1175/jamc-d-14-0050.1, 2014a.

2 Trömel, S., Ziegert, M., Ryzhkov, A. V., Chwala, C., and Simmer, C.: Using  
3 Microwave Backhaul Links to Optimize the Performance of Algorithms for  
4 Rainfall Estimation and Attenuation Correction, *J. Atmos. Oceanic Technol*, 31,  
5 1748-1760, 10.1175/jtech-d-14-00016.1, 2014b.

6 Zacharias, S., Bogena, H., Samaniego, L., Maude, M., Fuss, R., Putz, T., Frenzel, M.,  
7 Schwank, M., Baessler, C., Butterbach-Bahl, K., Bens, O., Borg, E., Brauer, A.,  
8 Dietrich, P., Hajnsek, I., Helle, G., Kiese, R., Kunstmann, H., Klotz, S., Munch, J.  
9 C., Papen, H., Priesack, E., Schmid, H.P., Steinbrecher, R., Rosenbaum, U.,  
10 Teutsch, G., Vereecken, H.: A Network of Terrestrial Environmental  
11 Observatories in Germany. *Vadose Zone J.*, 10, 955-973, 10.2136/vzj2010.0139,  
12 2011.

13 Zhang, G., Vivekanandan, J., and Brandes, E.: A method for estimating rain rate and  
14 drop size distribution from polarimetric radar measurements, *IEEE Trans. Geosci.*  
15 *Remote Sens.*, 39, 830-841, 10.1109/36.917906, 2001.

16 Zrnić, D. S., and Ryzhkov, A. V.: Polarimetry for Weather Surveillance Radars, *B.*  
17 *Amer. Meteor Soc*, 80, 389-406,  
18 10.1175/1520-0477(1999)080<0389:pfwsr>2.0.co;2, 1999.

19 Zrnić, D. S., Keenan, T. D., Carey, L. D., and May, P.: Sensitivity Analysis of  
20 Polarimetric Variables at a 5-cm Wavelength in Rain, *J. Appl. Meteorol.*, 39,  
21 1514-1526, 10.1175/1520-0450(2000)039<1514:saopva>2.0.co;2, 2000.

22
